# Supplementary material
Source: PubMed Central journal article supplement (PMC8016711)
Supplement: NIHMS1667956-supplement-supplement.pdf [file NIHMS1667956-supplement-supplement.pdf]

## Supplementary tables

Table S1. Questions in the CDR by domain and the response options with dummy coding

|                              |               | <b>Question number</b> | <b>CDR question</b>                                                                                     | <b>CDR response options</b>                                                       |
|------------------------------|---------------|------------------------|---------------------------------------------------------------------------------------------------------|-----------------------------------------------------------------------------------|
| Community Affairs            | study partner | Q1                     | Is the subject still working?                                                                           | 0=yes; 1=no                                                                       |
|                              |               | Q2                     | Did memory or thinking problems contribute to the subject's decision to retire?                         | 1=yes; 0=no                                                                       |
|                              |               | Q3                     | Significant difficulty in job due to problems with memory and thinking?                                 | 0=rarely/never, 1=sometimes, 2=usually                                            |
|                              |               | Q4a                    | Did he/she ever drive a car?                                                                            | 0=yes; 1=no                                                                       |
|                              |               | Q4b                    | Does the subject drive a car now?                                                                       | 0=yes; 1=no                                                                       |
|                              |               | Q4c                    | If no, is this because of memory/thinking problems?                                                     | 1=yes, 0=no                                                                       |
|                              |               | Q5                     | If he/she is still driving, are there problems or risks because of poor thinking?                       | 1=yes, 0=no                                                                       |
|                              |               | Q6                     | Is he/she able to independently shop for needs?                                                         | 2=rarely/never; 1=sometimes; 0=usually                                            |
|                              |               | Q7                     | Is he/she able to independently carry out activities outside the home?                                  | 2=rarely/never; 1=sometimes; 0=usually                                            |
|                              |               | Q8                     | Is he/she taken to social functions outside a family home?                                              | 0=yes; 1=no                                                                       |
|                              |               | Q9                     | Would a casual observer of the subject's behavior think the subject was ill?                            | 1=yes; 0=no                                                                       |
| Judgment and Problem Solving | study partner | Q1                     | In general, if you had to rate he/she abilities to solve problems at present time, would you rate them? | 0=as good; 1=good, but not as good as before; 2=fair; 3=poor; 4=no ability at all |
|                              |               | Q2                     | Rate he/she ability to cope with small amounts of money                                                 | 0=no loss; 1=some loss; 2= severe loss                                            |
|                              |               | Q3                     | Rate he/she ability of handle complicated financial/business transactions                               | 0=no loss; 1=some loss; 2= severe loss                                            |

|                   |    |                                                                                                                                       |                                                                                              |
|-------------------|----|---------------------------------------------------------------------------------------------------------------------------------------|----------------------------------------------------------------------------------------------|
|                   | Q4 | Can he/she handle a household emergency?                                                                                              | 0=better than before;<br>1=as well as before;<br>2=worse than before due to trouble thinking |
|                   | Q5 | Can he/she understand situations/explanations?                                                                                        | 0=usually;<br>1=sometimes;<br>2=rarely                                                       |
|                   | Q6 | Does he/she behave appropriately [i.e., in his/her usual (premorbid) manner] in social situations and interactions with other people? | 0=usually;<br>1=sometimes;<br>2=rarely                                                       |
| study participant | Q1 | How are these things alike?<br>Turnip/Cauliflower                                                                                     | 0=vegetable;<br>1=living things/can be cooked; 2=wrong                                       |
|                   | Q2 | How are these things alike?<br>Desk/Bookcase                                                                                          | 0=furniture, office furniture, hold books;<br>1=wooden, legs;<br>2=wrong                     |
|                   | Q3 | What is the difference between these things? Lie/Mistake                                                                              | 0=one intentional, one deliberate; 1=one bad, one good, or explains only one thing; 2=wrong  |
|                   | Q4 | What is the difference between these things? River/Canal                                                                              | 0=natural - artificial;<br>1=anything else                                                   |
|                   | Q5 | How many nickels in a dollar?                                                                                                         | 0=correct;<br>1=incorrect                                                                    |
|                   | Q6 | How many quarters in 6.75?                                                                                                            | 0=correct;<br>1=incorrect                                                                    |
|                   | Q7 | Subtract 3 from 20 and keep subtracting 3 from each new number all the way down                                                       | 0=correct;<br>1=incorrect                                                                    |
|                   | Q8 | Upon arriving in a strange city, how would you locate a friend you wanted to see?                                                     | 0=telephone book, courthouse, mutual friend; 1=call police/operator; 2=no clear response     |
|                   | Q9 | Subject's assessment of disability/station in life and understanding of why he/she is present at examination                          | 0=good insight;<br>1=partial insight; 2=little insight                                       |

|        |                                                |                           |                                                                                                                                            |                                                  |
|--------|------------------------------------------------|---------------------------|--------------------------------------------------------------------------------------------------------------------------------------------|--------------------------------------------------|
| Memory | study partner                                  | Q1 and Q1a                | Does he/she have a problem with memory or thinking? Is this a consistent problem?                                                          | 0=no problem;<br>1=inconsistent;<br>2=consistent |
|        |                                                | Q2                        | Can he/she recall recent events                                                                                                            | 0=usually;<br>1=sometimes;<br>2=rarely           |
|        |                                                | Q3                        | Can he/she remember a short list of items (shopping)                                                                                       | 0=usually;<br>1=sometimes;<br>2=rarely           |
|        |                                                | Q4                        | Has there been some decline in memory over the past year                                                                                   | 1=yes; 0=no                                      |
|        |                                                | Q5                        | Is his/her memory impaired to a degree that it would have interfered with his/her daily life a few years ago?                              | 1=yes; 0=no                                      |
|        |                                                | Q6                        | Does he/she completely forget a major event?                                                                                               | 2=usually;<br>1=sometimes;<br>0=rarely           |
|        |                                                | Q7                        | Does he/she forget pertinent details for the major event?                                                                                  | 2=usually;<br>1=sometimes;<br>0=rarely           |
|        |                                                | Q8                        | Does he/she completely forget important info from the distant past?                                                                        | 2=usually;<br>1=sometimes;<br>0=rarely           |
|        | study participant                              | Q1                        | Do you have problems with memory or thinking?                                                                                              | 1=yes;0=no                                       |
|        |                                                | Q2                        | A few moments ago your (spouse, etc.) told me a few recent experiences you had. Will you tell me something about those? (autobiographical) | 0=largely correct; 1; 2; 3; 4=largely incorrect  |
|        |                                                | Q4                        | When were you born?                                                                                                                        | 0=correct;<br>1=incorrect                        |
|        |                                                | Q5                        | Where were you born?                                                                                                                       | 0=correct;<br>1=incorrect                        |
|        |                                                | Q6a                       | What was the last school you attended (Name)?                                                                                              | 0=correct;<br>1=incorrect                        |
|        |                                                | Q6b                       | What was the last school you attended (Place)?                                                                                             | 0=correct;<br>1=incorrect                        |
| Q6c    | What was the last school you attended (grade)? | 0=correct;<br>1=incorrect |                                                                                                                                            |                                                  |

|             |               |                   |                                                                                       |                                                                             |                           |
|-------------|---------------|-------------------|---------------------------------------------------------------------------------------|-----------------------------------------------------------------------------|---------------------------|
|             |               | Q7                | What was your main occupation?                                                        | 0=correct;<br>1=incorrect                                                   |                           |
|             |               | Q8                | What was your last major job?                                                         | 0=correct;<br>1=incorrect                                                   |                           |
|             |               | Q9                | When did you retire and why?                                                          | 0=correct;<br>1=incorrect                                                   |                           |
|             |               | Q10               | Repeat the name and address (John Brown 42 Market Street, Chicago)                    | 0=all correct;<br>1=1 wrong;<br>2=2wrong;<br>3=3wrong;4=4wrong;<br>5=5wrong |                           |
| Orientation | study partner | Q1                | How often does he/she know the exact date of the month?                               | 0=usually;<br>1=sometimes;<br>2=rarely                                      |                           |
|             |               | Q2                | How often does he/she know the exact month?                                           | 0=usually;<br>1=sometimes;<br>2=rarely                                      |                           |
|             |               | Q3                | How often does he/she know the exact year?                                            | 0=usually;<br>1=sometimes;<br>2=rarely                                      |                           |
|             |               | Q4                | How often does he/she know the exact day of the week?                                 | 0=usually;<br>1=sometimes;<br>2=rarely                                      |                           |
|             |               | Q5                | Does he/she have difficulty with time relationships?                                  | 2=usually;<br>1=sometimes;<br>0=rarely                                      |                           |
|             |               | Q6                | Can he/she find their way around familiar streets?                                    | 0=usually;<br>1=sometimes;<br>2=rarely                                      |                           |
|             |               | Q7                | How often does he/she know how to get from place to place outside their neighborhood? | 0=usually;<br>1=sometimes;<br>2=rarely                                      |                           |
|             |               | Q8                | How often can he/she find their way about indoors?                                    | 0=usually;<br>1=sometimes;<br>2=rarely                                      |                           |
|             |               | study participant | Q1                                                                                    | What is the date today?                                                     | 0=correct;<br>1=incorrect |
|             |               |                   | Q2                                                                                    | What day of the week is it?                                                 | 0=correct;<br>1=incorrect |

|               |               |    |                                                                      |                                                                  |
|---------------|---------------|----|----------------------------------------------------------------------|------------------------------------------------------------------|
|               |               | Q3 | What is the month?                                                   | 0=correct;<br>1=incorrect                                        |
|               |               | Q4 | What is the year?                                                    | 0=correct;<br>1=incorrect                                        |
|               |               | Q5 | What is the name of this place?                                      | 0=correct;<br>1=incorrect                                        |
|               |               | Q6 | What town or city are we in?                                         | 0=correct;<br>1=incorrect                                        |
|               |               | Q7 | What time is it?                                                     | 0=correct;<br>1=incorrect                                        |
|               |               | Q8 | Does the subject know who the informant is (in your judgement)?      | 0=correct;<br>1=incorrect                                        |
| Personal Care | study partner | Q1 | What is your estimate of he/she mental abilities: Dressing?          | 0=unaided;<br>1=occasionally bad;<br>2=commonly bad;<br>3=unable |
|               |               | Q2 | What is your estimate of he/she mental abilities: Washing/Grooming?  | 0=unaided;<br>1=occasionally bad;<br>2=commonly bad;<br>3=unable |
|               |               | Q3 | What is your estimate of he/she mental abilities: Eating habits?     | 0=unaided;<br>1=occasionally bad;<br>2=commonly bad;<br>3=unable |
|               |               | Q4 | What is your estimate of he/she mental abilities: Sphincter control? | 0=unaided;<br>1=occasionally bad;<br>2=commonly bad;<br>3=unable |

Table S2. Fit statistics for the confirmatory factor analysis

| Domain                       | RMSEA | 95% CI |       | TLI  | CFI  |
|------------------------------|-------|--------|-------|------|------|
| Community Affairs            | 0.026 | 0.021  | 0.032 | 0.99 | 0.99 |
| Judgment and Problem Solving | 0.075 | 0.071  | 0.079 | 0.91 | 0.93 |
| Memory                       | 0.046 | 0.043  | 0.048 | 0.97 | 0.98 |
| Orientation                  | 0.059 | 0.056  | 0.062 | 0.97 | 0.97 |
| Personal Care                | 0     | 0      | 0.035 | 1    | 1    |

RMSEA: root mean square error of approximation (lower is better); TLI: Tucker-Lewis index; CFI: comparative fit index. TLI and CFI close to 0.95 or higher indicates good fit.

Table S3. Item discrimination (a) and difficulty (b) parameters estimated from the unidimensional IRT model for each domain. Discrimination parameter indicates how well an item in discriminating participants with different degrees of dementia severity (higher is better). Difficulty parameter represents the degree of dementia severity at which certain response options have a 50% likelihood of being selected.

|                              |                   |            | a     | b1     | b2    | b3    | b4    | b5 |
|------------------------------|-------------------|------------|-------|--------|-------|-------|-------|----|
| Community Affairs            | study partner     | Q1         | 1.007 | -1.302 |       |       |       |    |
|                              |                   | Q2         | 0.781 | 3.441  |       |       |       |    |
|                              |                   | Q3         | 1.931 | 0.612  | 1.644 |       |       |    |
|                              |                   | Q4a        | 1.251 | 3.220  |       |       |       |    |
|                              |                   | Q4b        | 2.062 | 1.342  |       |       |       |    |
|                              |                   | Q4c        | 0.593 | -0.266 |       |       |       |    |
|                              |                   | Q5         | 2.069 | 0.692  |       |       |       |    |
|                              |                   | Q6         | 4.865 | 0.704  | 1.596 |       |       |    |
|                              |                   | Q7         | 5.058 | 0.768  | 1.908 |       |       |    |
|                              |                   | Q8         | 1.022 | 4.299  |       |       |       |    |
|                              |                   | Q9         | 1.148 | 3.675  |       |       |       |    |
| Judgment and Problem Solving | study partner     | Q1         | 3.519 | -0.134 | 0.686 | 1.446 | 2.549 |    |
|                              |                   | Q2         | 3.302 | 0.940  | 1.789 |       |       |    |
|                              |                   | Q3         | 4.749 | 0.256  | 1.054 |       |       |    |
|                              |                   | Q4         | 2.837 | -2.882 | 0.818 |       |       |    |
|                              |                   | Q5         | 2.029 | 0.977  | 2.323 |       |       |    |
|                              |                   | Q6         | 1.138 | 2.316  | 4.854 |       |       |    |
|                              | study participant | Q1         | 1.271 | 1.450  | 2.759 |       |       |    |
|                              |                   | Q2         | 1.452 | 1.514  | 2.094 |       |       |    |
|                              |                   | Q3         | 1.575 | 1.187  | 1.885 |       |       |    |
|                              |                   | Q4         | 0.889 | 0.369  |       |       |       |    |
|                              |                   | Q5         | 1.623 | 1.718  |       |       |       |    |
|                              |                   | Q6         | 1.695 | 0.719  |       |       |       |    |
|                              |                   | Q7         | 1.599 | 0.742  |       |       |       |    |
|                              |                   | Q8         | 1.434 | 1.742  | 2.703 |       |       |    |
|                              |                   | Q9         | 2.346 | 0.826  | 1.892 |       |       |    |
| Memory                       | study partner     | Q1 and Q1a | 5.556 | -0.170 | 0.062 |       |       |    |
|                              |                   | Q2         | 3.534 | 0.447  | 1.415 |       |       |    |
|                              |                   | Q3         | 2.935 | -0.062 | 0.697 |       |       |    |
|                              |                   | Q4         | 3.630 | -0.173 |       |       |       |    |
|                              |                   | Q5         | 4.358 | 0.262  |       |       |       |    |
|                              |                   | Q6         | 3.354 | 1.281  |       |       |       |    |

|               |                   |               |       |        |       |       |       |       |  |
|---------------|-------------------|---------------|-------|--------|-------|-------|-------|-------|--|
|               |                   | Q7            | 3.676 | 0.439  |       |       |       |       |  |
|               |                   | Q8            | 1.666 | 0.873  | 2.225 |       |       |       |  |
|               | study participant | Q1            | 0.998 | -0.374 |       |       |       |       |  |
|               |                   | Q2            | 2.682 | 0.219  | 0.668 | 1.452 | 1.989 |       |  |
|               |                   | Q4            | 1.657 | 2.521  |       |       |       |       |  |
|               |                   | Q5            | 2.052 | 2.759  |       |       |       |       |  |
|               |                   | Q6a           | 1.884 | 2.155  |       |       |       |       |  |
|               |                   | Q6b           | 1.888 | 2.342  |       |       |       |       |  |
|               |                   | Q6c           | 1.796 | 2.626  |       |       |       |       |  |
|               |                   | Q7            | 2.265 | 2.504  |       |       |       |       |  |
|               |                   | Q8            | 2.291 | 1.897  |       |       |       |       |  |
|               |                   | Q9            | 1.996 | 0.918  |       |       |       |       |  |
|               |                   | Q10           | 1.934 | -0.280 | 0.389 | 0.853 | 1.168 | 1.359 |  |
| Orientation   |                   | study partner | Q1    | 3.782  | 0.287 | 0.934 |       |       |  |
|               |                   |               | Q2    | 5.985  | 1.041 | 1.525 |       |       |  |
|               | Q3                |               | 4.917 | 1.282  | 1.669 |       |       |       |  |
|               | Q4                |               | 4.104 | 0.519  | 1.284 |       |       |       |  |
|               | Q5                |               | 2.434 | 0.362  | 1.302 |       |       |       |  |
|               | Q6                |               | 1.871 | 1.528  | 2.313 |       |       |       |  |
|               | Q7                |               | 2.365 | 0.457  | 1.123 |       |       |       |  |
|               | Q8                |               | 1.640 | 2.405  | 3.304 |       |       |       |  |
|               | study participant | Q1            | 2.707 | 0.767  |       |       |       |       |  |
|               |                   | Q2            | 2.379 | 1.263  |       |       |       |       |  |
|               |                   | Q3            | 2.780 | 1.538  |       |       |       |       |  |
|               |                   | Q4            | 2.958 | 1.549  |       |       |       |       |  |
|               |                   | Q5            | 1.891 | 1.195  |       |       |       |       |  |
|               |                   | Q6            | 0.695 | -0.071 |       |       |       |       |  |
|               |                   | Q7            | 1.333 | 1.711  |       |       |       |       |  |
|               |                   | Q8            | 0.951 | 5.928  |       |       |       |       |  |
| Personal care | study partner     | Q1            | 3.933 | 1.521  | 2.799 |       |       |       |  |
|               |                   | Q2            | 2.709 | 1.572  | 3.005 | 4.164 |       |       |  |
|               |                   | Q3            | 2.266 | 2.362  | 4.581 |       |       |       |  |
|               |                   | Q4            | 1.550 | 2.915  | 3.967 | 5.436 |       |       |  |

Table S4. Correlation between factors estimated from the bi-factor IRT model.

| Correlation                  | General factor | Community Affair | Judgment and Problem Solving | Memory | Orientation | Personal Care |
|------------------------------|----------------|------------------|------------------------------|--------|-------------|---------------|
| General factor               | 1              | 0                | 0                            | 0      | 0           | 0             |
| Community Affair             |                | 1                | 0.55                         | 0.40   | 0.40        | 0.19          |
| Judgment and Problem Solving |                |                  | 1                            | 0.68   | 0.58        | 0.19          |
| Memory                       |                |                  |                              | 1      | 0.81        | 0.15          |
| Orientation                  |                |                  |                              |        | 1           | 0.17          |
| Personal Care                |                |                  |                              |        |             | 1             |

Table S5. Item discrimination (a) and intercept (b) parameters estimated from the bi-factor IRT model. a1 and a2 are the discrimination parameters for the general factor and the domain specific factor, respectively. d1 to d5 are the intercepts corresponding to the boundaries of the response probabilities. Detailed presentation of the parameters for the multi-dimensional IRT model can be found in Reckase 2009 [1].

|                              |                   |            | a1    | a2     | d1     | d2     | d3     | d4     | d5 |
|------------------------------|-------------------|------------|-------|--------|--------|--------|--------|--------|----|
| Community Affairs            | study partner     | Q3         | 2.682 | -0.098 | -1.303 | -3.683 |        |        |    |
|                              |                   | Q4c        | 0.649 | 0.264  | 0.064  |        |        |        |    |
|                              |                   | Q5         | 1.855 | 0.467  | -1.537 |        |        |        |    |
|                              |                   | Q6         | 4.136 | 1.671  | -3.564 | -7.462 |        |        |    |
|                              |                   | Q7         | 4.742 | 2.143  | -4.472 | -9.991 |        |        |    |
| Judgment and Problem Solving | study partner     | Q1         | 3.772 | 0.713  | 0.486  | -2.917 | -5.779 | -9.638 |    |
|                              |                   | Q2         | 3.265 | 0.740  | -3.454 | -6.225 |        |        |    |
|                              |                   | Q3         | 4.683 | 1.077  | -1.490 | -5.519 |        |        |    |
|                              |                   | Q4         | 2.619 | 0.520  | 7.872  | -2.414 |        |        |    |
|                              |                   | Q5         | 2.076 | 0.360  | -2.186 | -4.938 |        |        |    |
|                              | study participant | Q1         | 0.923 | 1.264  | -2.063 | -3.908 |        |        |    |
|                              |                   | Q2         | 1.078 | 1.369  | -2.463 | -3.408 |        |        |    |
|                              |                   | Q3         | 1.140 | 1.567  | -2.162 | -3.443 |        |        |    |
|                              |                   | Q5         | 1.162 | 1.562  | -3.173 |        |        |        |    |
|                              |                   | Q6         | 1.447 | 2.398  | -1.699 |        |        |        |    |
|                              |                   | Q7         | 1.221 | 1.763  | -1.452 |        |        |        |    |
|                              |                   | Q8         | 0.972 | 1.520  | -2.871 | -4.444 |        |        |    |
|                              |                   | Q9         | 2.109 | 1.220  | -2.145 | -4.766 |        |        |    |
| Memory                       | study partner     | Q1 and Q1a | 4.622 | 0.363  | 0.843  | -0.377 |        |        |    |
|                              |                   | Q2         | 3.053 | 0.558  | -1.584 | -4.864 |        |        |    |
|                              |                   | Q3         | 2.797 | 0.316  | 0.158  | -2.188 |        |        |    |



|             |                   |               |       |       |        |         |         |        |        |
|-------------|-------------------|---------------|-------|-------|--------|---------|---------|--------|--------|
|             |                   | Q4            | 3.408 | 0.196 | 0.611  |         |         |        |        |
|             |                   | Q5            | 3.941 | 0.500 | -1.205 |         |         |        |        |
|             |                   | Q6            | 2.869 | 0.784 | -4.289 |         |         |        |        |
|             |                   | Q7            | 3.128 | 0.480 | -1.586 |         |         |        |        |
|             |                   | Q8            | 1.446 | 0.426 | -1.469 | -3.692  |         |        |        |
|             | study participant | Q2            | 2.396 | 1.344 | -0.611 | -1.976  | -4.288  | -5.764 |        |
|             |                   | Q4            | 1.351 | 1.619 | -4.979 |         |         |        |        |
|             |                   | Q5            | 1.604 | 1.492 | -6.161 |         |         |        |        |
|             |                   | Q6a           | 1.435 | 2.139 | -5.215 |         |         |        |        |
|             |                   | Q6b           | 1.579 | 1.969 | -5.579 |         |         |        |        |
|             |                   | Q6c           | 1.380 | 1.817 | -5.663 |         |         |        |        |
|             |                   | Q7            | 1.984 | 1.485 | -6.302 |         |         |        |        |
|             |                   | Q8            | 1.989 | 1.502 | -4.909 |         |         |        |        |
|             |                   | Q9            | 1.709 | 1.220 | -2.027 |         |         |        |        |
|             |                   | Q10           | 1.869 | 1.565 | 0.652  | -0.931  | -2.053  | -2.811 | -3.260 |
| Orientation | study partner     | Q1            | 2.669 | 1.261 | -1.005 | -3.176  |         |        |        |
|             |                   | Q2            | 4.164 | 2.123 | -5.520 | -7.880  |         |        |        |
|             |                   | Q3            | 3.842 | 1.873 | -6.095 | -7.762  |         |        |        |
|             |                   | Q4            | 2.958 | 1.392 | -1.991 | -4.736  |         |        |        |
|             |                   | Q5            | 2.539 | 0.478 | -1.084 | -3.564  |         |        |        |
|             |                   | Q6            | 2.023 | 0.369 | -3.190 | -4.703  |         |        |        |
|             |                   | Q7            | 2.495 | 0.515 | -1.323 | -3.063  |         |        |        |
|             |                   | Q8            | 1.917 | 0.362 | -4.434 | -5.930  |         |        |        |
|             | study participant | Q1            | 2.311 | 1.991 | -2.456 |         |         |        |        |
|             |                   | Q2            | 2.015 | 1.512 | -3.354 |         |         |        |        |
|             |                   | Q3            | 2.440 | 2.098 | -5.106 |         |         |        |        |
|             |                   | Q4            | 2.786 | 2.663 | -6.056 |         |         |        |        |
|             |                   | Q5            | 1.664 | 1.203 | -2.534 |         |         |        |        |
|             | Personal Care     | study partner | Q1    | 3.210 | 2.307  | -6.306  | -10.864 |        |        |
| Q2          |                   |               | 2.574 | 1.863 | -5.023 | -9.010  | -12.191 |        |        |
| Q3          |                   |               | 1.978 | 1.492 | -5.764 | -10.746 |         |        |        |
| Q4          |                   |               | 1.267 | 1.026 | -4.686 | -6.317  | -8.593  |        |        |

Table S6. Factor loadings of the bi-factor IRT model with correlated domain specific factors. Factor loading is similar to correlation which represents the association between each an item and the factor.

|                                                 |                               |               | <b>General</b>           | <b>Community<br/>Affair</b> | <b>Judgment<br/>and<br/>Problem<br/>Solving</b> | <b>Memory</b> | <b>Orientation</b> | <b>Personal<br/>Care</b> |
|-------------------------------------------------|-------------------------------|---------------|--------------------------|-----------------------------|-------------------------------------------------|---------------|--------------------|--------------------------|
| <b>Community<br/>Affairs</b>                    | <b>Study<br/>partner</b>      | Q3            | 0.84                     | -0.03                       | 0                                               | 0             | 0                  | 0                        |
|                                                 |                               | Q4c           | 0.35                     | 0.14                        | 0                                               | 0             | 0                  | 0                        |
|                                                 |                               | Q5            | 0.73                     | 0.18                        | 0                                               | 0             | 0                  | 0                        |
|                                                 |                               | Q6            | 0.87                     | 0.35                        | 0                                               | 0             | 0                  | 0                        |
|                                                 |                               | Q7            | 0.87                     | 0.39                        | 0                                               | 0             | 0                  | 0                        |
| <b>Judgment<br/>and<br/>Problem<br/>Solving</b> | <b>study<br/>partner</b>      | Q1            | 0.90                     | 0                           | 0.17                                            | 0             | 0                  | 0                        |
|                                                 |                               | Q2            | 0.87                     | 0                           | 0.20                                            | 0             | 0                  | 0                        |
|                                                 |                               | Q3            | 0.92                     | 0                           | 0.21                                            | 0             | 0                  | 0                        |
|                                                 |                               | Q4            | 0.83                     | 0                           | 0.16                                            | 0             | 0                  | 0                        |
|                                                 |                               | Q5            | 0.77                     | 0                           | 0.13                                            | 0             | 0                  | 0                        |
|                                                 | <b>study<br/>participants</b> | Q1            | 0.40                     | 0                           | 0.55                                            | 0             | 0                  | 0                        |
|                                                 |                               | Q2            | 0.44                     | 0                           | 0.56                                            | 0             | 0                  | 0                        |
|                                                 |                               | Q3            | 0.44                     | 0                           | 0.61                                            | 0             | 0                  | 0                        |
|                                                 |                               | Q5            | 0.45                     | 0                           | 0.60                                            | 0             | 0                  | 0                        |
|                                                 |                               | Q6            | 0.44                     | 0                           | 0.73                                            | 0             | 0                  | 0                        |
|                                                 |                               | Q7            | 0.45                     | 0                           | 0.64                                            | 0             | 0                  | 0                        |
|                                                 |                               | Q8            | 0.39                     | 0                           | 0.61                                            | 0             | 0                  | 0                        |
|                                                 |                               | Q9            | 0.71                     | 0                           | 0.41                                            | 0             | 0                  | 0                        |
|                                                 |                               | <b>Memory</b> | <b>study<br/>partner</b> | Q1<br>and<br>Q1a            | 0.94                                            | 0             | 0                  | 0.07                     |
| Q2                                              | 0.86                          |               |                          | 0                           | 0                                               | 0.16          | 0                  | 0                        |
| Q3                                              | 0.85                          |               |                          | 0                           | 0                                               | 0.10          | 0                  | 0                        |
| Q4                                              | 0.89                          |               |                          | 0                           | 0                                               | 0.05          | 0                  | 0                        |
| Q5                                              | 0.91                          |               |                          | 0                           | 0                                               | 0.12          | 0                  | 0                        |
| Q6                                              | 0.84                          |               |                          | 0                           | 0                                               | 0.23          | 0                  | 0                        |
| Q7                                              | 0.87                          |               |                          | 0                           | 0                                               | 0.13          | 0                  | 0                        |
| Q8                                              | 0.64                          |               |                          | 0                           | 0                                               | 0.19          | 0                  | 0                        |
| <b>study<br/>participants</b>                   | Q2                            |               | 0.74                     | 0                           | 0                                               | 0.42          | 0                  | 0                        |
|                                                 | Q4                            |               | 0.50                     | 0                           | 0                                               | 0.60          | 0                  | 0                        |
|                                                 | Q5                            |               | 0.58                     | 0                           | 0                                               | 0.54          | 0                  | 0                        |
|                                                 | Q6a                           |               | 0.47                     | 0                           | 0                                               | 0.69          | 0                  | 0                        |
|                                                 | Q6b                           |               | 0.52                     | 0                           | 0                                               | 0.65          | 0                  | 0                        |
|                                                 | Q6c                           |               | 0.49                     | 0                           | 0                                               | 0.64          | 0                  | 0                        |
|                                                 | Q7                            |               | 0.66                     | 0                           | 0                                               | 0.49          | 0                  | 0                        |

|                      |                           |     |      |   |   |      |      |      |
|----------------------|---------------------------|-----|------|---|---|------|------|------|
|                      |                           | Q8  | 0.66 | 0 | 0 | 0.50 | 0    | 0    |
|                      |                           | Q9  | 0.63 | 0 | 0 | 0.45 | 0    | 0    |
|                      |                           | Q10 | 0.63 | 0 | 0 | 0.53 | 0    | 0    |
| <b>Orientation</b>   | <b>study partner</b>      | Q1  | 0.78 | 0 | 0 | 0    | 0.37 | 0    |
|                      |                           | Q2  | 0.84 | 0 | 0 | 0    | 0.43 | 0    |
|                      |                           | Q3  | 0.84 | 0 | 0 | 0    | 0.41 | 0    |
|                      |                           | Q4  | 0.80 | 0 | 0 | 0    | 0.38 | 0    |
|                      |                           | Q5  | 0.82 | 0 | 0 | 0    | 0.15 | 0    |
|                      |                           | Q6  | 0.76 | 0 | 0 | 0    | 0.14 | 0    |
|                      |                           | Q7  | 0.81 | 0 | 0 | 0    | 0.17 | 0    |
|                      |                           | Q8  | 0.74 | 0 | 0 | 0    | 0.14 | 0    |
|                      | <b>study participants</b> | Q1  | 0.66 | 0 | 0 | 0    | 0.57 | 0    |
|                      |                           | Q2  | 0.66 | 0 | 0 | 0    | 0.50 | 0    |
|                      |                           | Q3  | 0.67 | 0 | 0 | 0    | 0.58 | 0    |
|                      |                           | Q4  | 0.66 | 0 | 0 | 0    | 0.63 | 0    |
|                      |                           | Q5  | 0.62 | 0 | 0 | 0    | 0.45 | 0    |
| <b>Personal care</b> | <b>study participants</b> | Q1  | 0.75 | 0 | 0 | 0    | 0    | 0.54 |
|                      |                           | Q2  | 0.71 | 0 | 0 | 0    | 0    | 0.52 |
|                      |                           | Q3  | 0.66 | 0 | 0 | 0    | 0    | 0.50 |
|                      |                           | Q4  | 0.54 | 0 | 0 | 0    | 0    | 0.44 |

#### Reference

[1] Reckase MD. Multidimensional item response theory models. Multidimensional item response theory: Springer; 2009. p. 79-112.
